# Supplementary material for: Efficacy and safety of ixekizumab treatment in patients with axial spondyloarthritis: 2-year results from COAST
Source: PubMed Central journal article supplement — RMD Open. 2022 Jul 19;8(2):e002165. doi: 10.1136/rmdopen-2021-002165 (PMC9301795; doi:10.1136/rmdopen-2021-002165), 2022-07-19
Supplement: rmdopen-2021-002165supp002.pdf [file rmdopen-2021-002165supp002.pdf]

**Supplementary Table 1.** The proportions of patients achieving an ASAS40 response at week 52 among those who re-consented and did not re-consent to participate in COAST-Y.

|                           | <b>Re-consent<br/>(773/824)</b> | <b>Did not re-consent<br/>(51/824)</b> |
|---------------------------|---------------------------------|----------------------------------------|
| <b>ASAS40 at week 52:</b> |                                 |                                        |
| <b>Yes</b>                | 389/773 (50.3%)                 | 10/51 (19.6%)                          |
| <b>No</b>                 | 381/773 (49.3%)                 | 41/51 (80.4%)                          |
