# Supplementary material for: Efficacy and safety of ixekizumab treatment in patients with axial spondyloarthritis: 2-year results from COAST
Source: PubMed Central journal article supplement — RMD Open. 2022 Jul 19;8(2):e002165. doi: 10.1136/rmdopen-2021-002165 (PMC9301795; doi:10.1136/rmdopen-2021-002165), 2022-07-19
Supplement: rmdopen-2021-002165supp004.pdf [file rmdopen-2021-002165supp004.pdf]

**Supplementary Table 4. Summary of efficacy outcomes (observed) for patients Continuously treated with ixekizumab for 116 weeks. Data are presented by TNFi-experience and axSpA disease subtype.**

|                                           | All patients<br>N=352  |                        | Biologic DMARD-naïve  |                       |                       |                       | TNFi-experienced       |                        |
|-------------------------------------------|------------------------|------------------------|-----------------------|-----------------------|-----------------------|-----------------------|------------------------|------------------------|
|                                           |                        |                        | r-axSpA<br>N=114      |                       | nr-axSpA<br>N=104     |                       | r-axSpA<br>N=134       |                        |
|                                           | Week 52                | Week 116               | Week 52               | Week 116              | Week 52               | Week 116              | Week 52                | Week 116               |
| <b>Response: n/N (%)</b>                  |                        |                        |                       |                       |                       |                       |                        |                        |
| ASAS20                                    | 254/351<br>(72.4)      | 260/347<br>(74.9)      | 90/114<br>(78.9)      | 92/114<br>(80.7)      | 80/104<br>(76.9)      | 80/103<br>(77.7)      | 84/133<br>(63.2)       | 88/130<br>(67.7)       |
| ASAS40                                    | 181/351<br>(51.6)      | 197/347<br>(56.8)      | 67/114<br>(58.8)      | 74/114<br>(64.9)      | 62/104<br>(59.6)      | 60/103<br>(58.3)      | 52/133<br>(39.1)       | 63/130<br>(48.5)       |
| ASAS partial remission                    | 69/351<br>(19.7)       | 70/347<br>(20.2)       | 30/114<br>(26.3)      | 31/114<br>(27.2)      | 25/104<br>(24.0)      | 29/103<br>(28.2)      | 14/133<br>(10.5)       | 10/130<br>(7.7)        |
| ASAS 5/6                                  | 208/350<br>(59.4)      | 210/341<br>(61.6)      | 77/114<br>(67.5)      | 80/112<br>(71.4)      | 67/103<br>(65.0)      | 65/102<br>(63.7)      | 64/133<br>(48.1)       | 65/127<br>(51.2)       |
| CRP ≤5 mg/L                               | 241/348<br>(69.3)      | 260/343<br>(75.8)      | 90/114<br>(78.9)      | 94/114<br>(82.5)      | 79/104<br>(76.0)      | 81/103<br>(78.6)      | 72/130<br>(55.4)       | 85/126<br>(67.5)       |
| ASDAS LDA (<2.1)                          | 163/347<br>(47.0)      | 165/349<br>(47.3)      | 67/114<br>(58.8)      | 65/114<br>(57.0)      | 56/104<br>(53.8)      | 55/103<br>(53.4)      | 40/129<br>(31.0)       | 45/132<br>(34.1)       |
| ASDAS ID (<1.3)                           | 48/347<br>(13.8)       | 53/349<br>(15.2)       | 25/114<br>(21.9)      | 22/114<br>(19.3)      | 15/104<br>(14.4)      | 23/103<br>(22.3)      | 8/129<br>(6.2)         | 8/132<br>(6.1)         |
| BASDAI50                                  | 161/351<br>(45.9)      | 174/347<br>(50.1)      | 65/114<br>(57.0)      | 69/114<br>(60.5)      | 51/104<br>(49.0)      | 56/103<br>(54.4)      | 45/133<br>(33.8)       | 49/130<br>(37.7)       |
| ASDAS clinically important improvement    | 233/347<br>(67.1)      | 247/349<br>(70.8)      | 81/114<br>(71.1)      | 84/114<br>(73.7)      | 74/104<br>(71.2)      | 74/103<br>(71.8)      | 78/129<br>(60.5)       | 89/132<br>(67.4)       |
| ASDAS major improvement                   | 122/347<br>(35.2)      | 130/349<br>(37.2)      | 45/114<br>(39.5)      | 48/114<br>(42.1)      | 37/104<br>(35.6)      | 41/103<br>(39.8)      | 40/129<br>(31.0)       | 41/132<br>(31.1)       |
| <b>Change from baseline: mean (SD; n)</b> |                        |                        |                       |                       |                       |                       |                        |                        |
| ASDAS                                     | -1.63<br>(1.04; 347)   | -1.71<br>(1.09; 343)   | -1.76<br>(0.98; 114)  | -1.82<br>(0.99; 114)  | -1.71<br>(1.06; 104)  | -1.79<br>(1.20; 103)  | -1.44<br>(1.05; 129)   | -1.56<br>(1.07; 126)   |
| BASDAI                                    | -3.25<br>(2.18; 351)   | -3.40<br>(2.21; 347)   | -3.56<br>(2.21; 114)  | -3.66<br>(2.18; 114)  | -3.52<br>(2.07; 104)  | -3.71<br>(2.30; 103)  | -2.78<br>(2.16; 133)   | -2.93<br>(2.10; 130)   |
| BASDAI inflammation <sup>a</sup>          | -3.54<br>(2.45; 351)   | -3.65<br>(2.40; 347)   | -3.79<br>(2.47; 114)  | -3.84<br>(2.38; 114)  | -3.79<br>(2.51; 104)  | -3.87<br>(2.53; 103)  | -3.12<br>(2.34; 133)   | -3.32<br>(2.28; 130)   |
| CRP (mg/L)                                | -10.49<br>(21.61; 348) | -11.27<br>(22.40; 343) | -9.70<br>(13.45; 114) | -9.96<br>(13.36; 114) | -8.70<br>(16.33; 104) | -8.91<br>(16.45; 103) | -12.61<br>(29.62; 130) | -14.38<br>(31.21; 126) |
| PatGA                                     | -3.3<br>(2.5; 351)     | -3.4<br>(2.6; 347)     | -3.5<br>(2.4; 114)    | -3.6<br>(2.5; 114)    | -3.6<br>(2.4; 104)    | -3.7<br>(2.8; 103)    | -3.0<br>(2.6; 133)     | -3.0<br>(2.5; 130)     |
| BASFI                                     | -2.86<br>(2.34; 351)   | -2.99<br>(2.36; 347)   | -3.06<br>(2.19; 114)  | -3.23<br>(2.18; 114)  | -3.15<br>(2.60; 104)  | -3.28<br>(2.63; 103)  | -2.46<br>(2.22; 133)   | -2.54<br>(2.23; 130)   |
| BASMI                                     | -0.55<br>(0.93; 351)   | -0.60<br>(0.97; 345)   | -0.61<br>(0.86; 114)  | -0.67<br>(0.90; 114)  | -0.59<br>(0.95; 104)  | -0.57<br>(0.91; 103)  | -0.46<br>(0.97; 133)   | -0.56<br>(1.07; 128)   |
| ASAS HI                                   | -3.19<br>(3.43; 351)   | -3.37<br>(3.84; 347)   | -3.20<br>(3.15; 114)  | -3.42<br>(3.69; 114)  | -3.77<br>(3.68; 104)  | -3.91<br>(3.97; 103)  | -2.72<br>(3.42; 133)   | -2.91<br>(3.84; 130)   |
| SF-36 PCS                                 | 8.98<br>(8.03; 351)    | 9.27<br>(8.60; 347)    | 8.89<br>(7.15; 114)   | 9.13<br>(7.63; 114)   | 10.36<br>(9.08; 104)  | 10.58<br>(10.75; 103) | 7.96<br>(7.78; 133)    | 8.36<br>(7.34; 130)    |
| SF-36 MCS                                 | 4.41<br>(9.67; 351)    | 3.87<br>(10.45; 347)   | 4.02<br>(9.49; 114)   | 3.35<br>(9.93; 114)   | 4.77<br>(9.44; 104)   | 4.07<br>(10.62; 103)  | 4.47<br>(10.05; 133)   | 4.16<br>(10.81; 130)   |

|                                |                    |                    |                    |                    |                    |                    |                    |                    |
|--------------------------------|--------------------|--------------------|--------------------|--------------------|--------------------|--------------------|--------------------|--------------------|
| Spinal pain due to AS          | -3.5<br>(2.5; 351) | -3.7<br>(2.5; 347) | -4.0<br>(2.3; 114) | -4.1<br>(2.4; 114) | -3.6<br>(2.6; 104) | -3.8<br>(2.7; 103) | -3.0<br>(2.6; 133) | -3.2<br>(2.4; 130) |
| Spinal pain at night due to AS | -3.7<br>(2.6; 351) | -3.8<br>(2.6; 347) | -4.0<br>(2.4; 114) | -4.3<br>(2.5; 114) | -3.9<br>(2.7; 104) | -4.0<br>(2.7; 103) | -3.2<br>(2.7; 133) | -3.2<br>(2.5; 130) |

Baseline was defined as week 0 of originating study.

<sup>a</sup>Mean of BASDAI questions 5 and 6

Abbreviations: ASAS, Assessment of Spondyloarthritis International Society; ASASx, x% improvement of ASAS criteria; ASAS HI, Assessment of Spondyloarthritis International Society Health Index, ASDAS, Ankylosing Spondylitis Disease Activity Score; axSpA, axial spondyloarthritis; ID, inactive disease; IXE, ixekizumab; nr-axSpA, non-radiographic axSpA; PatGA, Patient Global Assessment of Disease Activity; LDA, low disease activity; MCS, Mental Component Score; PCS, Physical Component Score; r-axSpA, radiographic axSpA; SF-36, 36-item Questionnaire Short-Form Health Survey; TNFi, tumour necrosis factor inhibitor; Q2W, every 2 weeks; Q4W, every 4 weeks.
