# Supplementary material for: Efficacy and safety of ixekizumab treatment in patients with axial spondyloarthritis: 2-year results from COAST
Source: PubMed Central journal article supplement — RMD Open. 2022 Jul 19;8(2):e002165. doi: 10.1136/rmdopen-2021-002165 (PMC9301795; doi:10.1136/rmdopen-2021-002165), 2022-07-19
Supplement: rmdopen-2021-002165supp006.pdf [file rmdopen-2021-002165supp006.pdf]

**Supplementary Table 5. Summary of efficacy outcomes at weeks 52 and 116 in the ITT population who received  $\geq 1$  dose of IXE (observed and imputed)**

| Response: n/N (%)                         | Efficacy population (N=932)<br>(Weeks 0-116) |                   |                     |                   |                   |                 |                    |                 |                    |                   |                     |                   |
|-------------------------------------------|----------------------------------------------|-------------------|---------------------|-------------------|-------------------|-----------------|--------------------|-----------------|--------------------|-------------------|---------------------|-------------------|
|                                           | PBO/IXE<br>N=272                             |                   |                     |                   | ADA/IXE<br>N=86   |                 |                    |                 | IXE<br>N=574       |                   |                     |                   |
|                                           | Week 52                                      |                   | Week 116            |                   | Week 52           |                 | Week 116           |                 | Week 52            |                   | Week 116            |                   |
|                                           | Observed                                     | Imputed           | Observed            | Imputed           | Observed          | Imputed         | Observed           | Imputed         | Observed           | Imputed           | Observed            | Imputed           |
| ASAS20                                    | 165/252<br>(65.5)                            | 165/272<br>(60.7) | 150/207<br>(72.5)   | 150/272<br>(55.1) | 58/81<br>(71.6)   | 58/86<br>(67.4) | 52/70<br>(74.3)    | 52/86<br>(60.5) | 341/496<br>(68.8)  | 341/574<br>(59.4) | 311/413<br>(75.3)   | 311/574<br>(54.2) |
| ASAS40                                    | 113/252<br>(44.8)                            | 113/272<br>(41.5) | 116/207<br>(56.0)   | 116/272<br>(42.6) | 44/81<br>(54.3)   | 44/86<br>(51.2) | 39/70<br>(55.7)    | 39/86<br>(45.3) | 247/496<br>(49.8)  | 247/574<br>(43.0) | 235/413<br>(56.9)   | 235/574<br>(40.9) |
| CRP <5 mg/L                               | 169/248<br>(68.1)                            | 169/272<br>(62.1) | 144/205<br>(70.2)   | 144/272<br>(52.9) | 63/80<br>(78.8)   | 63/86<br>(73.3) | 55/70<br>(78.6)    | 55/86<br>(64.0) | 343/487<br>(70.4)  | 343/574<br>(59.8) | 302/407<br>(74.2)   | 302/574<br>(52.6) |
| ASDAS ID (<1.3)                           | 32/248<br>(12.9)                             | 32/272<br>(11.8)  | 33/207<br>(15.9)    | 33/272<br>(12.1)  | 15/80<br>(18.8)   | 15/86<br>(17.4) | 12/70<br>(17.1)    | 12/86<br>(14.0) | 79/487<br>(16.2)   | 79/574<br>(13.8)  | 71/413<br>(17.2)    | 71/574<br>(12.4)  |
| ASDAS LDA (<2.1)                          | 92/248<br>(37.1)                             | 92/272<br>(33.8)  | 96/207<br>(46.4)    | 96/272<br>(35.3)  | 41/80<br>(51.3)   | 41/86<br>(47.7) | 41/70<br>(58.6)    | 41/86<br>(47.7) | 222/487<br>(45.6)  | 222/574<br>(38.7) | 203/413<br>(49.2)   | 203/574<br>(35.4) |
| BASDAI50                                  | 109/252<br>(43.3)                            | 109/272<br>(40.1) | 103/207<br>(49.8)   | 103/272<br>(37.9) | 39/81<br>(48.1)   | 39/86<br>(45.3) | 38/70<br>(54.3)    | 38/86<br>(44.2) | 221/496<br>(44.6)  | 221/574<br>(38.5) | 215/413<br>(52.1)   | 215/574<br>(37.5) |
| ASDAS clinically important improvement    | 147/248<br>(59.3)                            | 147/272<br>(54.0) | 138/207<br>(66.7)   | 138/272<br>(50.7) | 55/80<br>(68.8)   | 55/86<br>(64.0) | 45/70<br>(64.3)    | 45/86<br>(52.3) | 307/487<br>(63.0)  | 307/574<br>(53.5) | 284/413<br>(68.8)   | 284/574<br>(49.5) |
| ASDAS major improvement                   | 76/248<br>(30.6)                             | 76/272<br>(27.9)  | 79/207<br>(38.2)    | 79/272<br>(29.0)  | 28/80<br>(35.0)   | 28/86<br>(32.6) | 25/70<br>(35.7)    | 25/86<br>(29.1) | 170/487<br>(34.9)  | 170/574<br>(29.6) | 154/413<br>(37.3)   | 154/574<br>(26.8) |
| <b>Change from baseline: mean (SD; n)</b> |                                              |                   |                     |                   |                   |                 |                    |                 |                    |                   |                     |                   |
| ASDAS                                     | -1.49 (1.15; 248)                            |                   | -1.72 (1.16; 205)   |                   | -1.59 (1.07; 80)  |                 | -1.64 (1.06; 70)   |                 | -1.56 (1.12; 487)  |                   | -1.69 (1.13; 407)   |                   |
| BASDAI                                    | -2.90 (2.28; 252)                            |                   | -3.33 (2.24; 207)   |                   | -3.12 (2.27; 81)  |                 | -3.33 (2.24; 70)   |                 | -3.14 (2.36; 496)  |                   | -3.43 (2.33; 413)   |                   |
| BASDAI inflammation <sup>a</sup>          | -3.05 (2.50; 252)                            |                   | -3.42 (2.51; 207)   |                   | -3.37 (2.38; 81)  |                 | -3.61 (2.40; 70)   |                 | -3.43 (2.63; 496)  |                   | -3.69 (2.50; 413)   |                   |
| CRP (mg/L)                                | -11.39 (24.71; 248)                          |                   | -12.97 (25.04; 205) |                   | -9.96 (17.46; 80) |                 | -10.42 (18.60; 70) |                 | -9.45 (20.19; 487) |                   | -10.79 (21.94; 407) |                   |
| PatGA                                     | -3.02 (2.83; 252)                            |                   | -3.49 (2.69; 207)   |                   | -3.21 (2.72; 81)  |                 | -3.51 (2.77; 70)   |                 | -3.25 (2.72; 496)  |                   | -3.48 (2.70; 413)   |                   |
| BASFI                                     | -2.45 (2.41; 252)                            |                   | -3.00 (2.42; 207)   |                   | -2.73 (2.31; 81)  |                 | -2.95 (2.39; 70)   |                 | -2.79 (2.53; 496)  |                   | -3.04 (2.50; 413)   |                   |
| BASMI                                     | -0.48 (0.91; 252)                            |                   | -0.52 (0.87; 203)   |                   | -0.60 (0.92; 81)  |                 | -0.67 (0.99; 70)   |                 | -0.52 (0.95; 496)  |                   | -0.57 (0.98; 410)   |                   |
| ASAS HI                                   | -2.69 (3.56; 252)                            |                   | -3.07 (3.53; 207)   |                   | -3.00 (3.68; 81)  |                 | -3.14 (3.49; 70)   |                 | -3.27 (3.63; 496)  |                   | -3.42 (3.92; 412)   |                   |
| SF-36 PCS                                 | 7.48 (8.22; 252)                             |                   | 8.32 (8.56; 207)    |                   | 7.87 (7.88; 81)   |                 | 7.65 (7.63; 70)    |                 | 9.04 (8.70; 496)   |                   | 9.61 (9.10; 412)    |                   |
| Spinal pain due to AS                     | -3.22 (2.62; 252)                            |                   | -3.66 (2.57; 207)   |                   | -3.36 (2.43; 81)  |                 | -3.51 (2.37; 70)   |                 | -3.45 (2.72; 496)  |                   | -3.71 (2.62; 413)   |                   |

|                                |                   |                   |                  |                  |                   |                   |
|--------------------------------|-------------------|-------------------|------------------|------------------|-------------------|-------------------|
| Spinal pain at night due to AS | -3.38 (2.81; 252) | -3.71 (2.76; 207) | -3.69 (2.66; 81) | -4.04 (2.65; 70) | -3.63 (2.80; 496) | -3.83 (2.68; 413) |
|--------------------------------|-------------------|-------------------|------------------|------------------|-------------------|-------------------|

Baseline was defined as Week 0 of originating study.

<sup>a</sup>Mean of BASDAI questions 5 and 6

Abbreviations: ADA, adalimumab; ASAS, Assessment of Spondyloarthritis International Society; ASASx, x% improvement of ASAS criteria; ASAS HI, Assessment of Spondyloarthritis International Society Health Index, ASDAS, Ankylosing Spondylitis Disease Activity Score; bDMARD, biologic disease-modifying anti-rheumatic drug; CRP, C-reactive protein; ID, inactive disease; ITT, intent-to-treat; IXE, ixekizumab; PatGA, Patient Global Assessment of Disease Activity; LDA, low activity disease; MCS, Mental Component Score; PBO, placebo; PCS, Physical Component Score; SF-36, 36-item Questionnaire Short-Form Health Survey; TNFi, tumour necrosis factor inhibitor; Q2W, every 2 weeks; Q4W, every 4 weeks.
