# Supplementary material for: Efficacy and safety of ixekizumab treatment in patients with axial spondyloarthritis: 2-year results from COAST
Source: PubMed Central journal article supplement — RMD Open. 2022 Jul 19;8(2):e002165. doi: 10.1136/rmdopen-2021-002165 (PMC9301795; doi:10.1136/rmdopen-2021-002165), 2022-07-19
Supplement: rmdopen-2021-002165supp008.pdf [file rmdopen-2021-002165supp008.pdf]

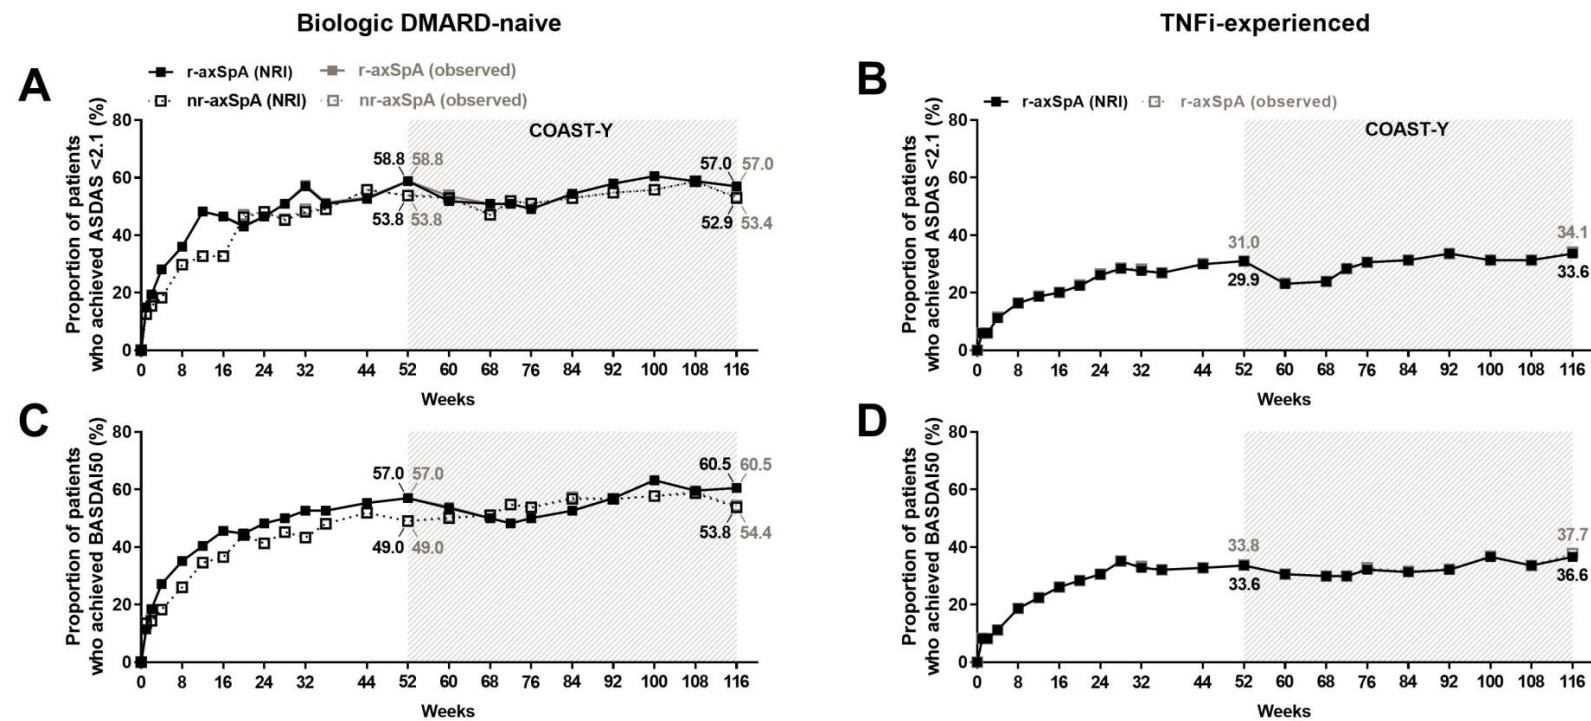

**Supplementary Figure 1.** Proportion of patients achieving ASDAS <2.1 and BASDAI50 responses for 116 weeks of continuous IXE treatment for (A, C) biologic DMARD-naïve patients and (B, D) TNFi-experienced patients. Missing data among the Continuously treated with IXE patients was imputed using NRI. The study was not designed to allow comparison between bDMARD-naïve patients with r-axSpA and bDMARD-naïve patients with nr-axSpA. Data are presented as the proportion (%) of patients, both NRI (black) and observed (grey) values. ASDAS, Ankylosing Spondylitis Disease Activity Score; axSpA, axial spondyloarthritis; BASDAI50, 50% improvement in Bath Ankylosing Spondylitis Disease Activity Index; nr-axSpA, non-radiographic axSpA; r-axSpA, radiographic axSpA; TNFi, tumour necrosis factor inhibitor.
